# Supplementary material
Source: PubMed Central journal article supplement (PMC9338833)
Supplement: mmc1.pdf [file mmc1.pdf]

## **Supplementary Data**

### **Supplementary Methods**

Coronavirus-related literature from January 1, 1992 to June 30, 2022 was retrieved from the Web of Science Core Collection (WoSCC) with the formula of ((TS=(coronavirus)) AND TS=(coronaviruses)) AND DT=(Article). COVID-19 and SARS-COV-2-related literature from January 1, 2020 to June 30, 2022 was were retrieved from the WoSCC also; the literature type was limited to “article,” the search field was set to “Title”, and the specific search formula was (TI = COVID-19 OR TI= “Coronavirus disease 2019” OR TI = COVID-2019 OR TI = 2019-nCoV OR TI = nCov-2019 OR TI = SARS-COV-2 OR TI = “Severe acute respiratory syndrome coronavirus 2” OR TI = “Novel Coronavirus”).

VOSviewer (version 1.6.15) software was used to analyze the volume of publications, cooperation relationships, and keyword co-occurrence relationships between countries or institutions.

Supplementary Table 1 types of documents published from January 1, 2020 to June 30, 2022.

| Document Types                         | RC     | Percentage % |
|----------------------------------------|--------|--------------|
| Articles                               | 149388 | 59.052       |
| Letters                                | 28124  | 11.117       |
| Editorial Materials                    | 25803  | 10.2         |
| Meeting Abstracts                      | 20925  | 8.272        |
| Review Articles                        | 20730  | 8.194        |
| Early Access                           | 13200  | 5.218        |
| News Items                             | 2875   | 1.136        |
| Corrections                            | 2473   | 0.978        |
| Proceedings Papers                     | 2425   | 0.959        |
| Book Reviews                           | 215    | 0.085        |
| Data Papers                            | 200    | 0.079        |
| Book Chapters                          | 120    | 0.047        |
| Retractions                            | 74     | 0.029        |
| Reprints                               | 16     | 0.006        |
| Retracted Publications                 | 15     | 0.006        |
| Biographical-Items                     | 12     | 0.005        |
| Expression Of Concern                  | 10     | 0.004        |
| Item Withdrawal                        | 10     | 0.004        |
| Poetry                                 | 9      | 0.004        |
| Withdrawn Publication                  | 7      | 0.003        |
| Publication With Expression Of Concern | 5      | 0.002        |
| Art Exhibit Reviews                    | 2      | 0.001        |
| Dance Performance Reviews              | 2      | 0.001        |
| Hardware Reviews                       | 1      | 0            |
| TV Review, Radio Review Videos         | 1      | 0            |

Supplementary Table 2 Journals of publications on COVID-19.

| Journal                                                              | Number |
|----------------------------------------------------------------------|--------|
| INTERNATIONAL JOURNAL OF ENVIRONMENTAL<br>RESEARCH AND PUBLIC HEALTH | 3462   |
| PLOS ONE                                                             | 2701   |
| SCIENTIFIC REPORTS                                                   | 1641   |
| FRONTIERS IN PUBLIC HEALTH                                           | 1299   |
| FRONTIERS IN PSYCHOLOGY                                              | 1254   |
| SUSTAINABILITY                                                       | 1217   |
| VACCINES                                                             | 1019   |
| CUREUS JOURNAL OF MEDICAL SCIENCE                                    | 997    |
| BMJ OPEN                                                             | 970    |
| JOURNAL OF CLINICAL MEDICINE                                         | 884    |

Supplementary Table 3. The top-10 most cited articles from January 1, 2020 to June 30, 2022 in the field of COVID-19.

| Title                                                                                                                             | Date     | TC    | Journal            | First author    | DOI                                                                                       |
|-----------------------------------------------------------------------------------------------------------------------------------|----------|-------|--------------------|-----------------|-------------------------------------------------------------------------------------------|
| Clinical Characteristics of Coronavirus Disease 2019 in China                                                                     | Apr 2020 | 15160 | N. Engl. J. Med.   | Wei-Jie Guan    | <a href="https://doi.org/10.1056/NEJMoa2002032">10.1056/NEJMoa2002032</a>                 |
| Clinical features of patients infected with 2019 novel coronavirus in Wuhan, China                                                | Feb 2020 | 13819 | Lancet             | Chaolin Huang   | <a href="https://doi.org/10.1016/S0140-6736(20)30183-5">10.1016/S0140-6736(20)30183-5</a> |
| Clinical course and risk factors for mortality of adult inpatients with COVID-19 in Wuhan, China: a retrospective cohort study    | Mar 2020 | 13113 | Lancet             | Feihu Zhou      | <a href="https://doi.org/10.1016/S0140-6736(20)30566-3">10.1016/S0140-6736(20)30566-3</a> |
| A Novel Coronavirus from Patients with Pneumonia in China, 2019                                                                   | Feb 2020 | 12922 | N. Engl. J. Med.   | Na Zhu          | <a href="https://doi.org/10.1056/NEJMoa2001017">10.1056/NEJMoa2001017</a>                 |
| Antibody Responses to SARS-CoV-2 in Patients with Novel Coronavirus Disease 2019                                                  | Oct 2020 | 10631 | Clin. Infect. Dis. | Juanjuan Zhao   | <a href="https://doi.org/10.1093/cid/ciaa344">10.1093/cid/ciaa344</a>                     |
| SARS-CoV-2 Cell Entry Depends on ACE2 and TMPRSS2 and Is Blocked by a Clinically Proven Protease Inhibitor                        | Apr 2020 | 8708  | Cell               | Markus Hoffmann | <a href="https://doi.org/10.1016/j.cell.2020.02.052">10.1016/j.cell.2020.02.052</a>       |
| Clinical Characteristics of 138 Hospitalized Patients With 2019 Novel Coronavirus-Infected Pneumonia in Wuhan, China              | Mar 2020 | 8040  | JAMA               | Dawei Wang      | <a href="https://doi.org/10.1001/jama.2020.1585">10.1001/jama.2020.1585</a>               |
| Epidemiological and clinical characteristics of 99 cases of 2019 novel coronavirus pneumonia in Wuhan, China: a descriptive study | Feb 2020 | 7464  | Lancet             | Nanshan Chen    | <a href="https://doi.org/10.1016/S0140-6736(20)30211-7">10.1016/S0140-6736(20)30211-7</a> |
| Neurologic Manifestations of Hospitalized Patients with Coronavirus Disease 2019 in Wuhan, China                                  | Jun 2020 | 7305  | JAMA Neurol.       | Lingna Mao      | <a href="https://doi.org/10.1001/jamaneurol.2020.1127">10.1001/jamaneurol.2020.1127</a>   |
| Genomic characterisation and epidemiology of 2019 novel coronavirus: implications for virus origins and receptor binding          | Feb 2020 | 5820  | Lancet             | Roujian Lu      | <a href="https://doi.org/10.1016/S0140-6736(20)30251-8">10.1016/S0140-6736(20)30251-8</a> |

TC: total citations.

Supplementary Fig.1

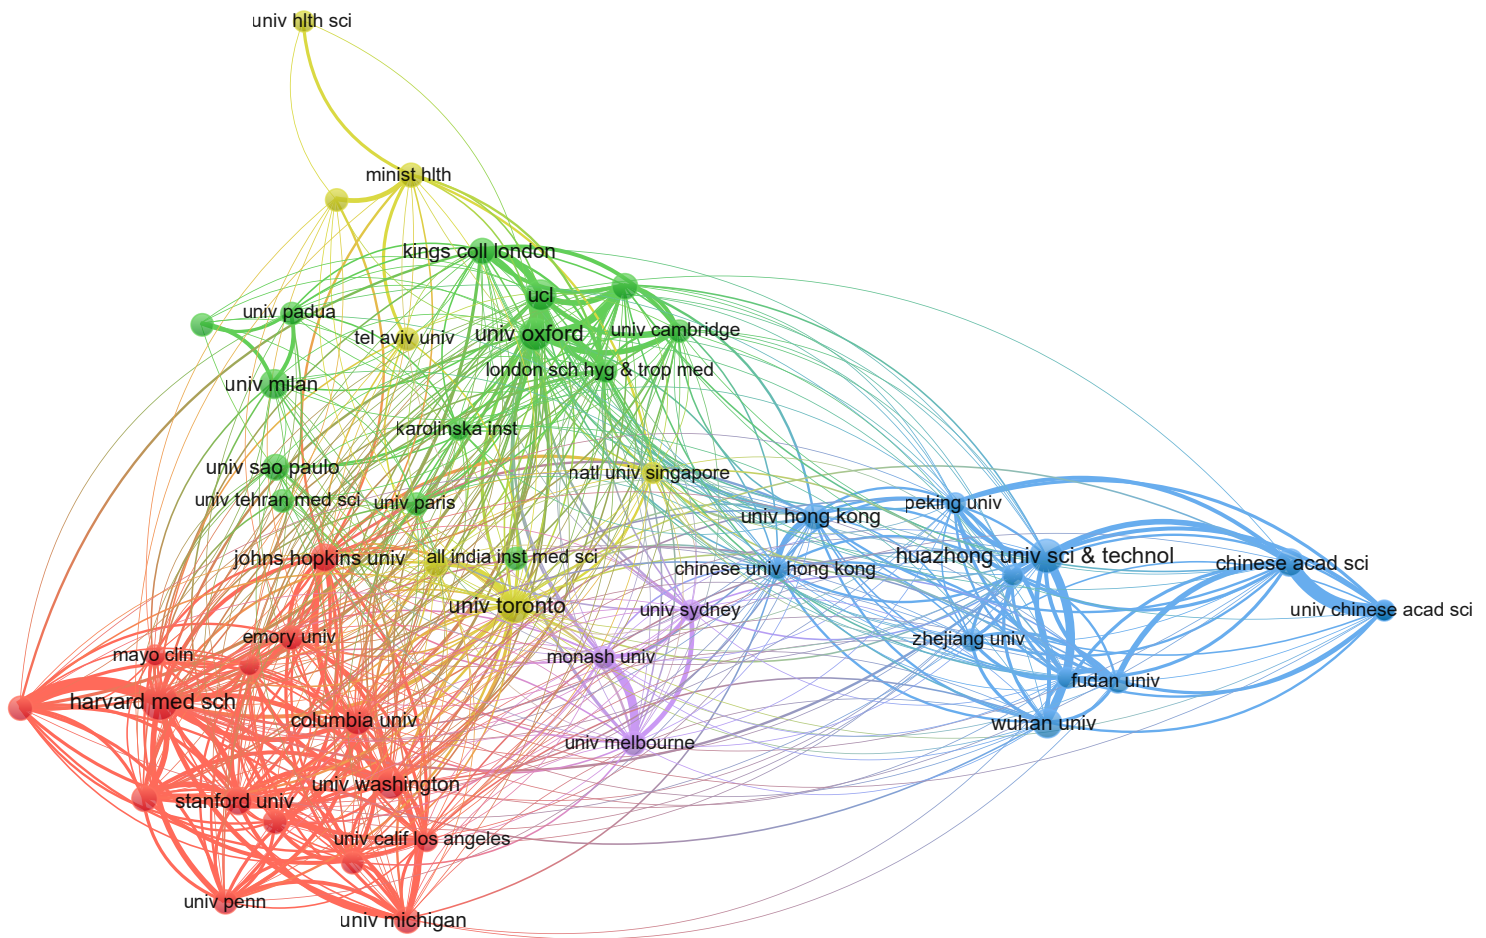

Supplementary Fig.1 The collaboration network of the top 50 most productive institutions. The size of the node presents the number of articles published by an institution, and the width of the edge between the two nodes indicates the degree of cooperation between the two institutions. The institutes belonging to the same country or region are present by the same color.
